# Supplementary material for: The Clinicopathological Distinction between Immune-Mediated Necrotizing Myopathy and Limb–Girdle Muscular Dystrophy R2: Key Points to Prevent Misdiagnosis
Source: MDPI journal article supplement (doi:10.3390/jcm11216566), 2022-11-05
Supplement: s1 [file s1]

**Supplementary Table S1.** Demographic features and pathogenic mutations in patients with LGMD R2.

| Patients              | 1            | 2          | 3                        | 4          | 5                         | 6          | 7                        | 8               |
|-----------------------|--------------|------------|--------------------------|------------|---------------------------|------------|--------------------------|-----------------|
| Age of onset (years)  | 32           | 30         | 31                       | 26         | 57                        | 32         | 26                       | 24              |
| Gender                | Female       | Male       | Male                     | Male       | Male                      | Male       | Female                   | Female          |
| Family history        | No           | No         | No                       | No         | Yes                       | No         | No                       | No              |
| MSAs or MAAs          | (-)          | Unknown    | (-)                      | (-)        | (-)                       | (-)        | (-)                      | Unknown         |
| Misdiagnosed          | Yes          | Yes        | Yes                      | Yes        | No                        | No         | No                       | No              |
| <i>DYSF</i> mutations | c.2646-1 G>A | c.2977 T>C | c.3113 G>A<br>c.4863 C>A | c.5512 G>A | c.4714 C>T,<br>c.1393 G>C | c.5626 G>A | c.2125 C>T<br>c.5626 G>A | c.1141_1142insG |

**Abbreviations:** LGMD R2, limb-girdle muscular dystrophy R2; MSAs, myositis specific antibodies; MAAs, myositis associated antibodies; IHC, Immunohistochemistry.
